# Supplementary material for: A new designed hydrazine group-containing ruthenium complex used for catalytic hydrogenation of esters
Source: Royal Society of Chemistry journal article supplement (doi:10.1039/c5cc04242a), 2015-01-01
Supplement: c5cc04242a1.pdf [file c5cc04242a1.pdf]

*Supporting Information for*

**A New Designed Hydrazine Group-contained Ruthenium Complex  
Used for Catalytic Hydrogenation of Esters**

*Xuefeng Tan, Qingli Wang, Yuanhua Liu, Fangyuan Wang, Hui Lv\*, and Xumu Zhang\**

**Table of Contents**

|                                 |   |
|---------------------------------|---|
| 1. General information .....    | 2 |
| 2. Synthetic details .....      | 2 |
| 3. Catalytic study details..... | 4 |
| 4. NMR and mass spectra.....    | 4 |
| 5. Reference .....              | 9 |

## 1. General information

Unless mentioned otherwise, all experiments were carried out under an atmosphere of argon or using standard Schlenk techniques. Solvents were dried with standard procedures and degassed with N<sub>2</sub>. <sup>1</sup>H, <sup>13</sup>C, <sup>31</sup>P NMR spectrum were recorded on NMR spectra were recorded on Bruker ADVANCE III (400 MHz) spectrometers for <sup>1</sup>H, <sup>13</sup>C, <sup>31</sup>P NMR. With CDCl<sub>3</sub> or CD<sub>2</sub>Cl<sub>2</sub> as the solvent and tetramethylsilane as the internal standard. Chemical shifts were reported upfield to TMS (0.00 ppm) for <sup>1</sup>H NMR and relative to CDCl<sub>3</sub> (77.0 ppm) for <sup>13</sup>C NMR. Column Chromatography was performed with silica gel Merck 60 (300-400 mesh). GC analysis was carried out on Angilent 1200 Series instrument using achiral capillary columns.

## 2. Synthetic details

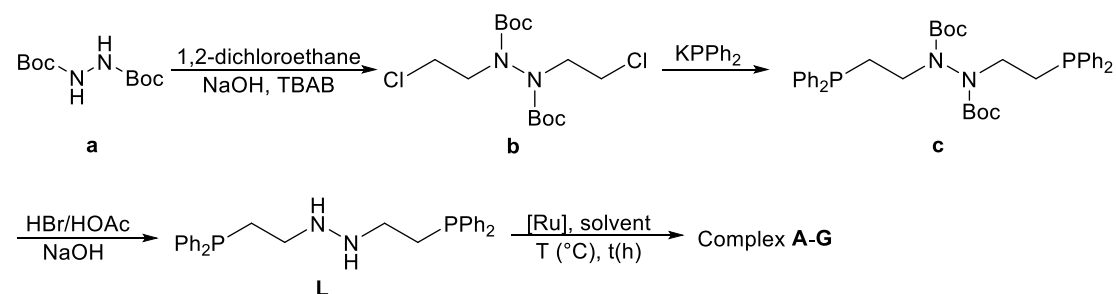

Compound **a** and **b** were synthesized according to the literature procedure.<sup>1,2</sup>

Preparation of **c**:

HPPH<sub>2</sub> (8.19 g, 44 mmol) was added to a suspension of KO<sup>t</sup>Bu (6.72 g, 60 mmol) in THF (120 mL) at room temperature. The mixture was stirred at room temperature for 15 minutes, then a solution of compound **b** (7.14 g, 20 mmol) in 10 mL THF was added dropwise. After stirred at room temperature for 4 hours, saturated NaCl solution (50 mL) was added. Remove most of the THF under vacuo, the aqueous phase was extracted with ethyl acetate (3 × 50 mL). Dried with anhydrous Na<sub>2</sub>SO<sub>4</sub> and purified by column chromatography. A viscous liquid (7.89 g, 60%) was obtained. The product was obtained as a mixture of more than three conformations, due to the interaction of carbonyl group in –Boc substitute, which may exist as (cis, cis-**c**), (cis, trans-**c**) and (trans, trans-**c**). Reference 3 explained this phenomenon clearly. <sup>1</sup>H NMR (400 MHz, CDCl<sub>3</sub>): δ = 7.29–7.50 (m, 20H), 3.38–3.64 (m, 4H), 2.28–2.54 (m, 4H), 1.38–1.52 (m, 18H); <sup>13</sup>C NMR (101 MHz, CDCl<sub>3</sub>) It's difficult to recognize each peak as there exists more than one conformation; <sup>31</sup>P NMR (161.7 MHz, CDCl<sub>3</sub>): δ -20.50 (s), -21.08 (s), -21.21 (s), -21.37 (s). HRMS (ESI+), m/z 657.3041 ([M+H]<sup>+</sup>), calcd for C<sub>38</sub>H<sub>47</sub>N<sub>2</sub>O<sub>4</sub>P<sub>2</sub><sup>+</sup>: 657.3006.

Preparation of **L**:

Compound **c** (2.63 g, 4 mmol) was dissolved in 20 mL dichloromethane, HBr/HOAc (5.6 mL, 40% wt.) was added to the solution at 0 °C. During 4 hours, a white solid precipitated out. Solvent was removed under vacuum and the solid was washed with ethyl ether (15 mL × 3). Under a nitrogen atmosphere, the solid was suspended in

toluene (30 mL), a solution of NaOH (3.2 mL, 10% wt.) was added and stirred for 30 min. The organic phase was separated and washed with water (10 mL\*2). Dried with anhydrous Na<sub>2</sub>SO<sub>4</sub> and concentrated, a viscous liquid (1.65 g) was obtained, which can be used in the next step without further purification. <sup>1</sup>H NMR(400 MHz, CDCl<sub>3</sub>): δ = 7.44-7.50 (m, 8H), 7.32-7.40 (m, 12H), 3.10-3.21 (br, 2H), 2.84-3.00 (dt, J<sup>1</sup> = 6.8 Hz, J<sup>2</sup> = 8.4 Hz, 4H), 2.23-2.33 (t, J = 8.0 Hz, 4H); <sup>13</sup>C NMR (101 MHz, CDCl<sub>3</sub>) δ = 138.5, 138.3, 132.8, 132.7, 128.7, 128.6, 128.5, 48.2, 48.0, 27.2, 27.1; <sup>31</sup>P NMR (161.7 MHz, CDCl<sub>3</sub>): δ = -20.5(s). HRMS (ESI+), m/z 457.1971 ([M+H]<sup>+</sup>), calcd for C<sub>28</sub>H<sub>31</sub>N<sub>2</sub>P<sub>2</sub><sup>+</sup>: 457.1957.

#### Preparation of **Complex A-G**:

All complexes were prepared used a same procedure. Under a nitrogen atmosphere, ruthenium precursors (0.5 mmol, see Table 1) were added to a 25 mL schlenk vessel, a solution of d (0.55 mmol) in corresponding solvent (10 mL, see Table 1) was added. The mixture was heated to required temperatures and stirred for required time (Table 1). The reaction mixture was cooled to room temperature and concentrated. Ethyl ether (10 mL) was added and stirred for 5 min in an ice bath. The precipitates was filtered under a nitrogen atmosphere and washed with ethyl ether for two times. Corresponding complexes were obtained after dried under vacuum and used directly without further purification.

**Table 1. Reaction conditions of preparation of complex A-G.**

| Entry | [Ru]                                               | Solvent | T (°C) | t (h) | Complex  |
|-------|----------------------------------------------------|---------|--------|-------|----------|
| 1     | RuCl <sub>2</sub> (PPh <sub>3</sub> ) <sub>3</sub> | DCM     | 25     | 12    | <b>A</b> |
| 2     | RuCl <sub>2</sub> (PPh <sub>3</sub> ) <sub>3</sub> | THF     | 70     | 20    | <b>B</b> |
| 3     | RuCl <sub>2</sub> (PPh <sub>3</sub> ) <sub>3</sub> | Toluene | 110    | 24    | <b>C</b> |
| 4     | [RuCl <sub>2</sub> (p-cymene)] <sub>2</sub>        | THF     | 70     | 20    | <b>D</b> |
| 5     | [RuCl <sub>2</sub> (p-cymene)] <sub>2</sub>        | Dioxane | 100    | 12    | <b>E</b> |
| 6     | RuHCl(CO)(PPh <sub>3</sub> ) <sub>3</sub>          | Toluene | 110    | 10    | <b>F</b> |
| 7     | RuCl <sub>2</sub> (DMSO) <sub>4</sub>              | THF     | 70     | 12    | <b>G</b> |

NMR spectra of Complex A and B have the same conformation as follow:

<sup>1</sup>H NMR(400 MHz, CDCl<sub>3</sub>): δ = 6.80-7.54 (m, 35H, *aryl-H*), 5.69-5.92 (br, 1H, *NH*), 5.22-5.32 (br, 1H, *NH*), 3.51-3.76 (br, 2H, *NHCH<sub>2</sub>*), 3.26-3.47 (br, 2H, *NHCH<sub>2</sub>*), 2.66-2.85 (br, 1H, *PCH<sub>2</sub>*), 2.42-2.64 (br, 2H, *PCH<sub>2</sub>*), 2.16-2.29 (br, 1H, *PCH<sub>2</sub>*); <sup>31</sup>P NMR (161.7 MHz, CDCl<sub>3</sub>): δ = 40.9 (t, 1P, J = 28.6 Hz, **L<sub>P1</sub>**), δ = 28.4 (dd, 1P, J<sup>1</sup> = 308.8 Hz, J<sup>2</sup> = 29.1 Hz, **L<sub>P2</sub>**), δ = -3.8 (d-br, 1P, J = 308.8 Hz, PPh<sub>3</sub>), δ = -5.6 (s, free PPh<sub>3</sub>). The free and two broad peaks of PPh<sub>3</sub> revealed an equilibrium between the five- and six-coordinated species and the existence of interconversion between those species. The distinction between J<sub>P1-P2</sub> (29.1 Hz) and J<sub>P2-PPh<sub>3</sub></sub> (308.8 Hz) revealed P1 hold the cis-position to P2, and P2 hold the trans-position to PPh<sub>3</sub>, the small coupling constant of P1 (28.6 Hz) revealed P1 hold the cis-position to P2 and PPh<sub>3</sub>.

<sup>1</sup>H and <sup>31</sup>P NMR spectra showed the structure of catalysts **C - G** are extremely complicated, <sup>1</sup>H and <sup>31</sup>P NMR spectra showed the structure of catalysts **C - G** are

extremely complicated, and high-resolution mass spectra revealed there existed  $\text{RuCl}_2(\text{L})$  and its dimer or trimer. This may be due to the deficient coordinating atoms to fulfill the 18 electron compositions and solvents participated the coordination or even one hydrazine group coordinated with two ruthenium to form the dimer, trimer or oligomer complexes.

### 3. Catalytic study details

In an argon glovebox, a 5 mL vial equipped with a magnetic stirring bar, was added the required amount of complex **A-G** (1 mg/mL in used solvent) and base successively, the mixture was shaken homogeneously. To the mixture was added substrate (5 mmol) and the necessary amount of solvent (plus the solution of complex, 3 mL in all). The mixture was transferred to a stain-less autoclave and then was purged by three cycles of pressurization/venting with  $\text{H}_2$  (10 atm) then pressurized with  $\text{H}_2$  (50 atm) and disconnected from the  $\text{H}_2$  source. Then the autoclave was placed in an oil bath preheated to the desired temperature. After the desired reaction time, the autoclave was cooled in an ice bath, and the pressure was released slowly. The resulting mixture was filtered with a plug of silica gel and then analyzed by GC.

### 4. NMR and mass spectra

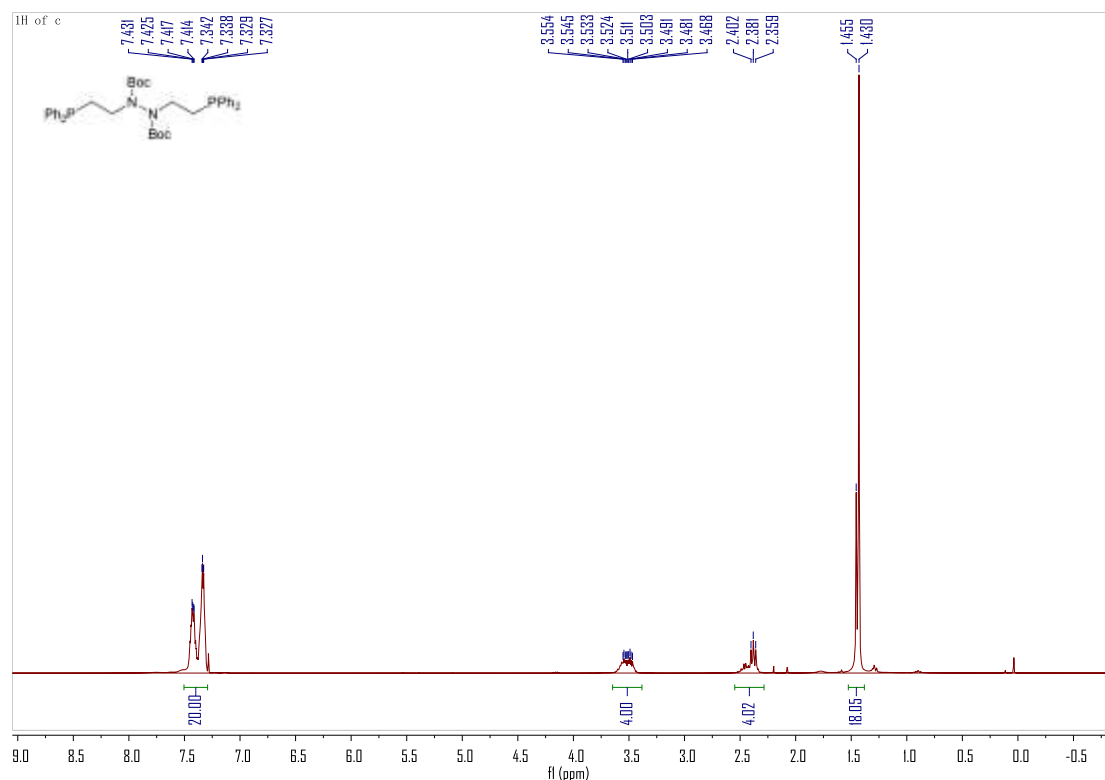

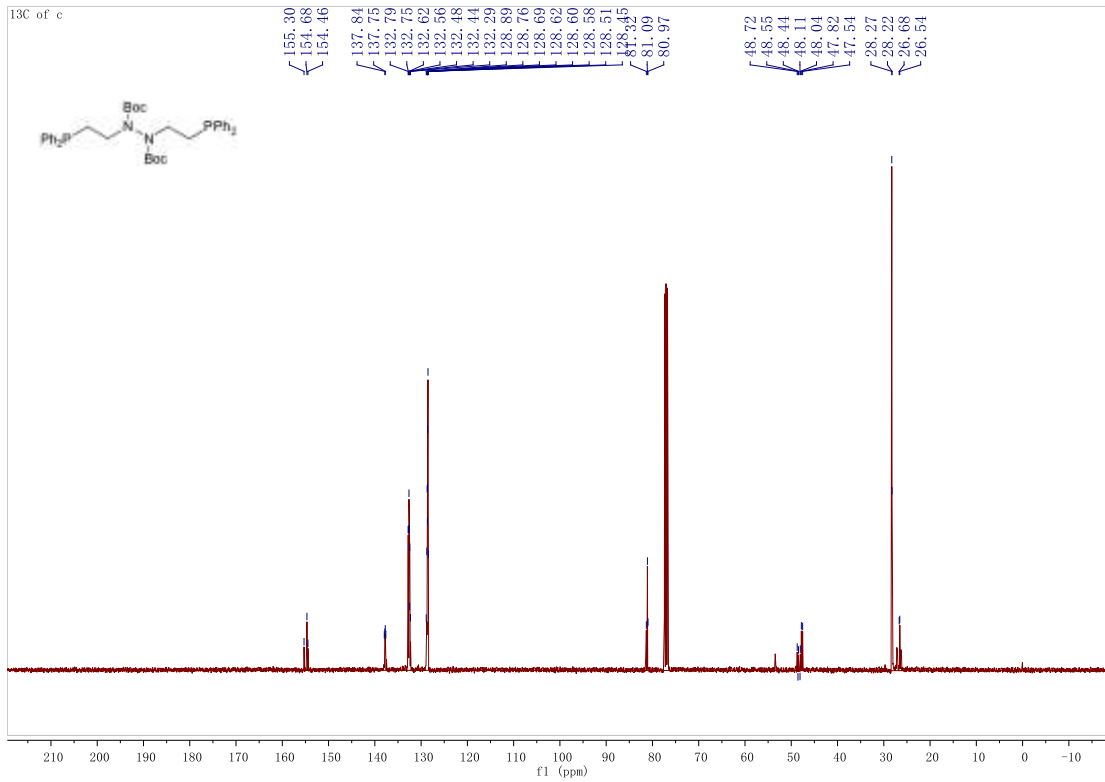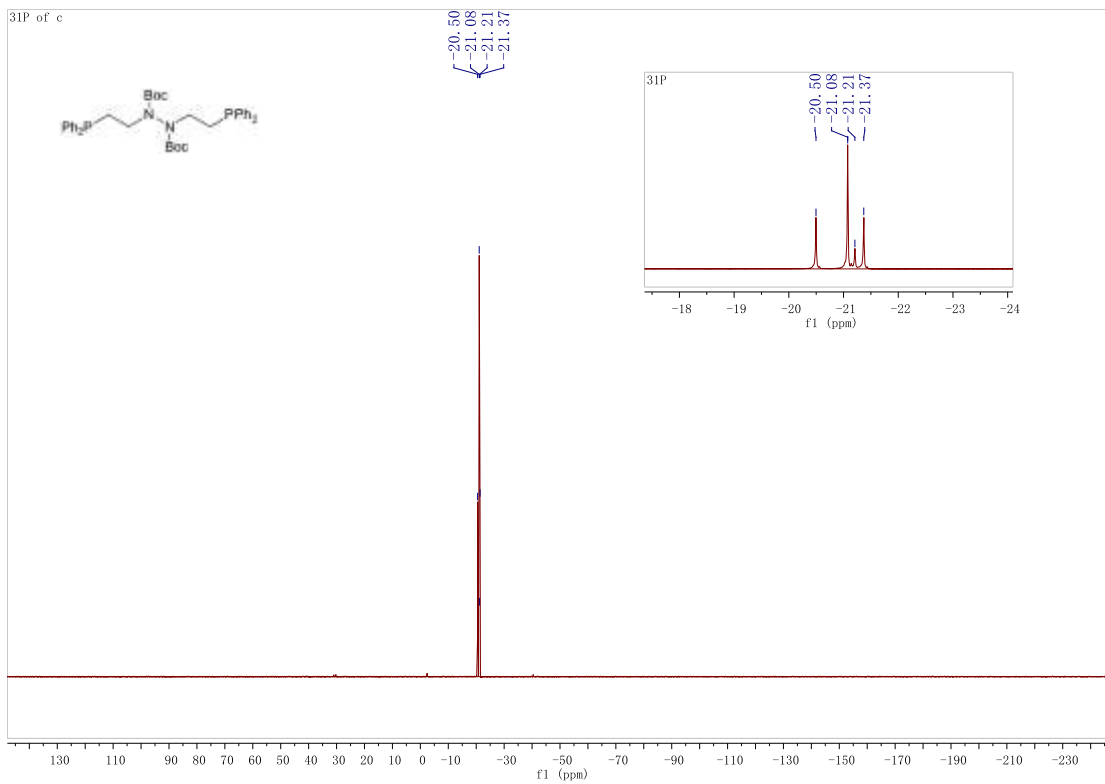

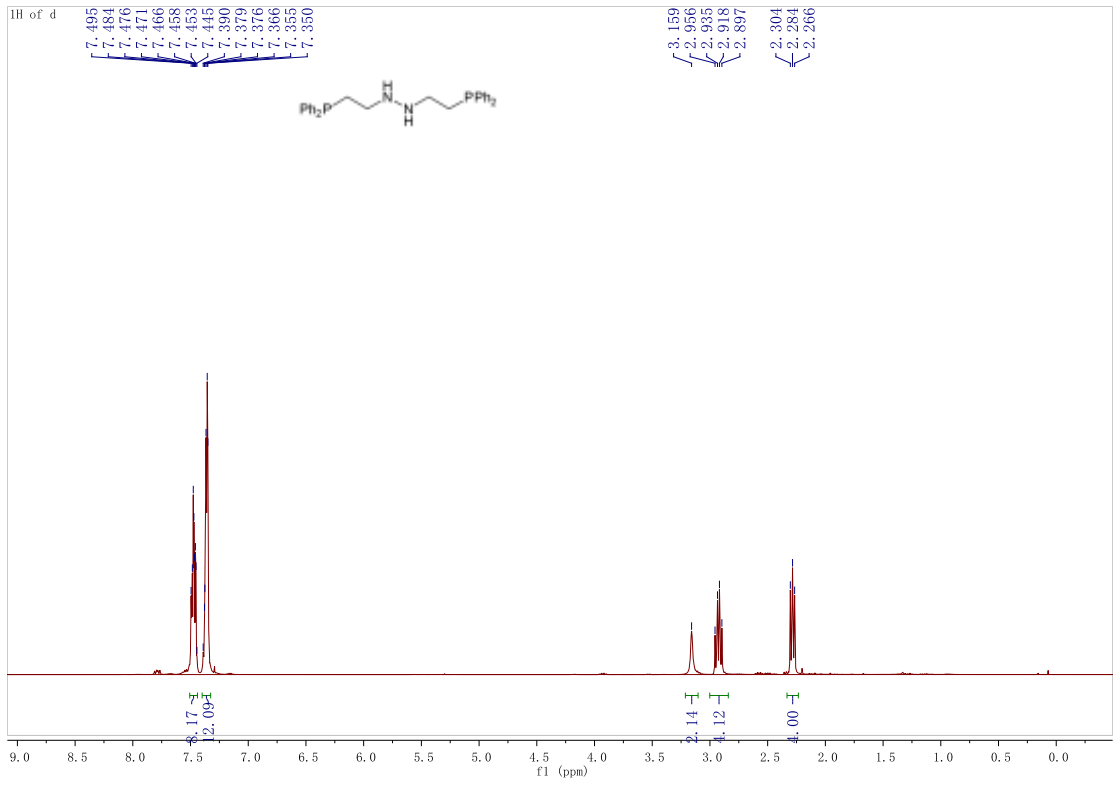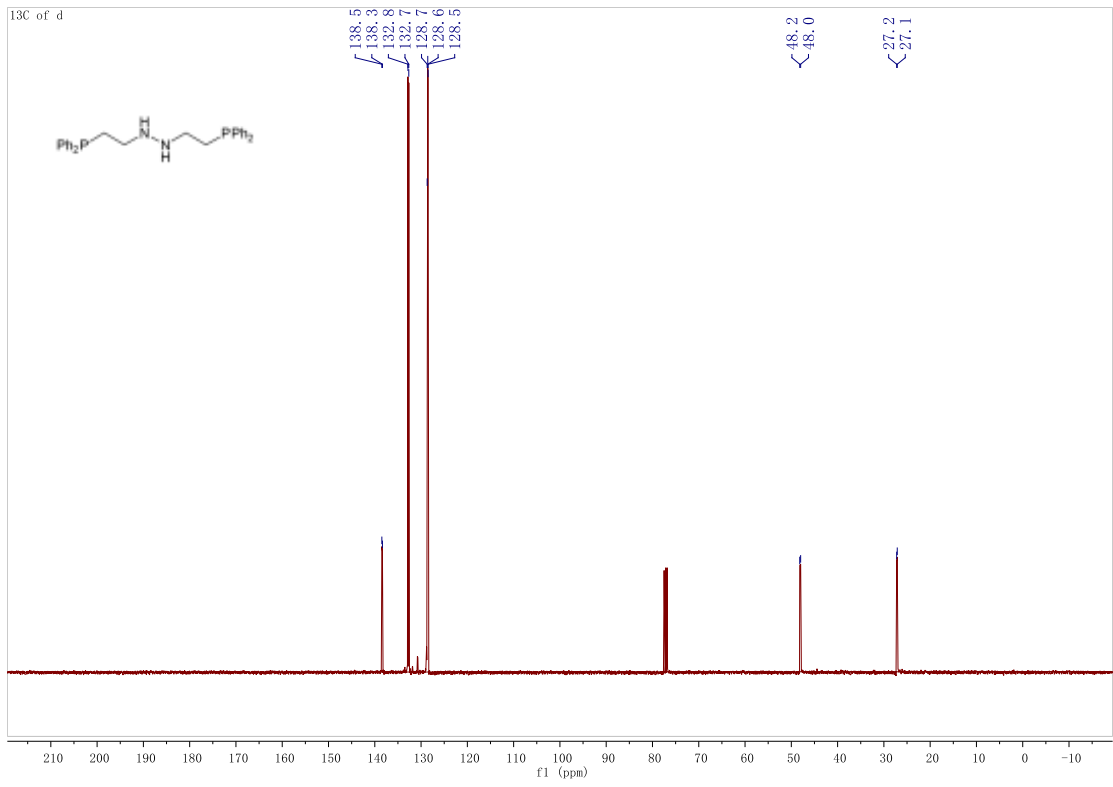

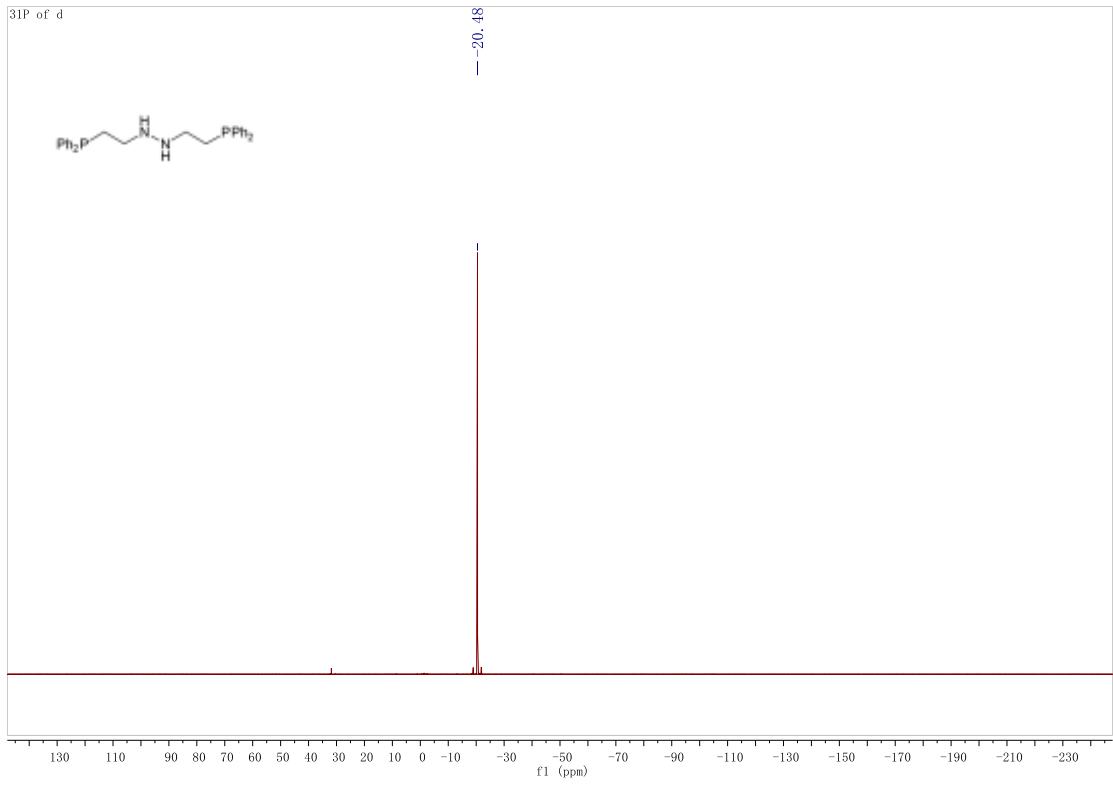

<sup>1</sup>H NMR of catalyst A/B

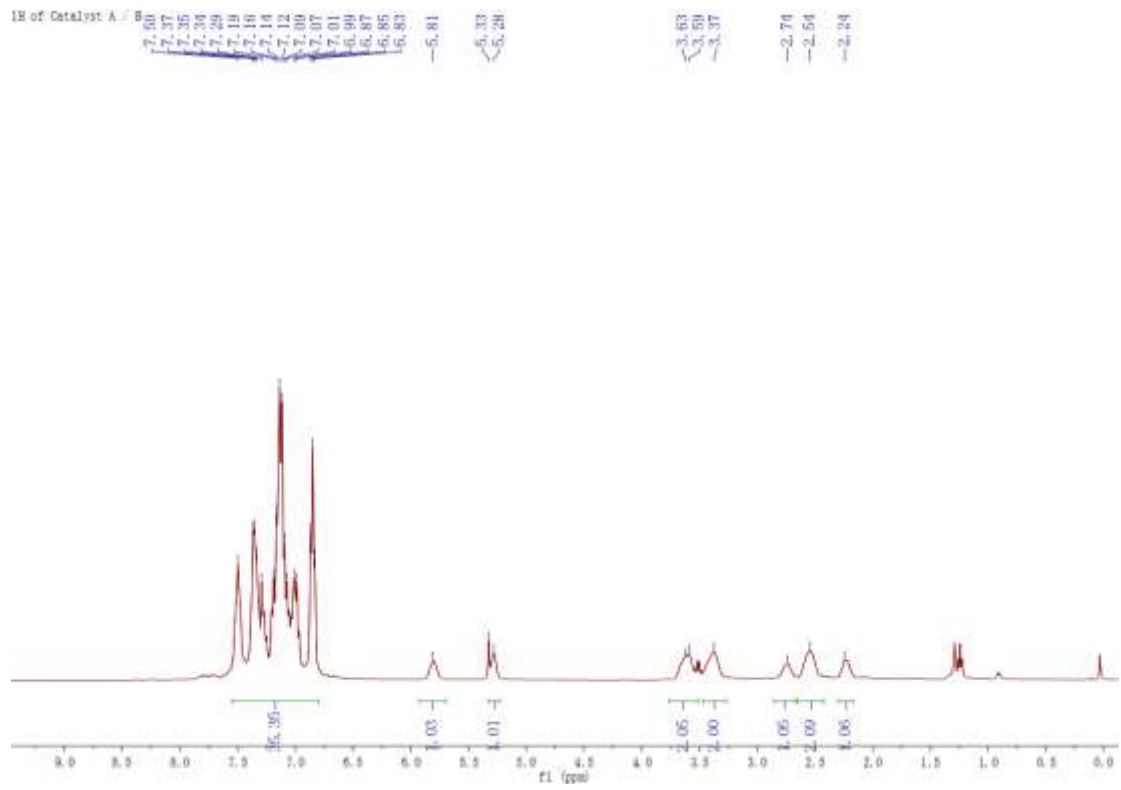

### $^{31}\text{P}$ NMR of catalyst A/B

$^{31}\text{P}$  of catalyst A / B

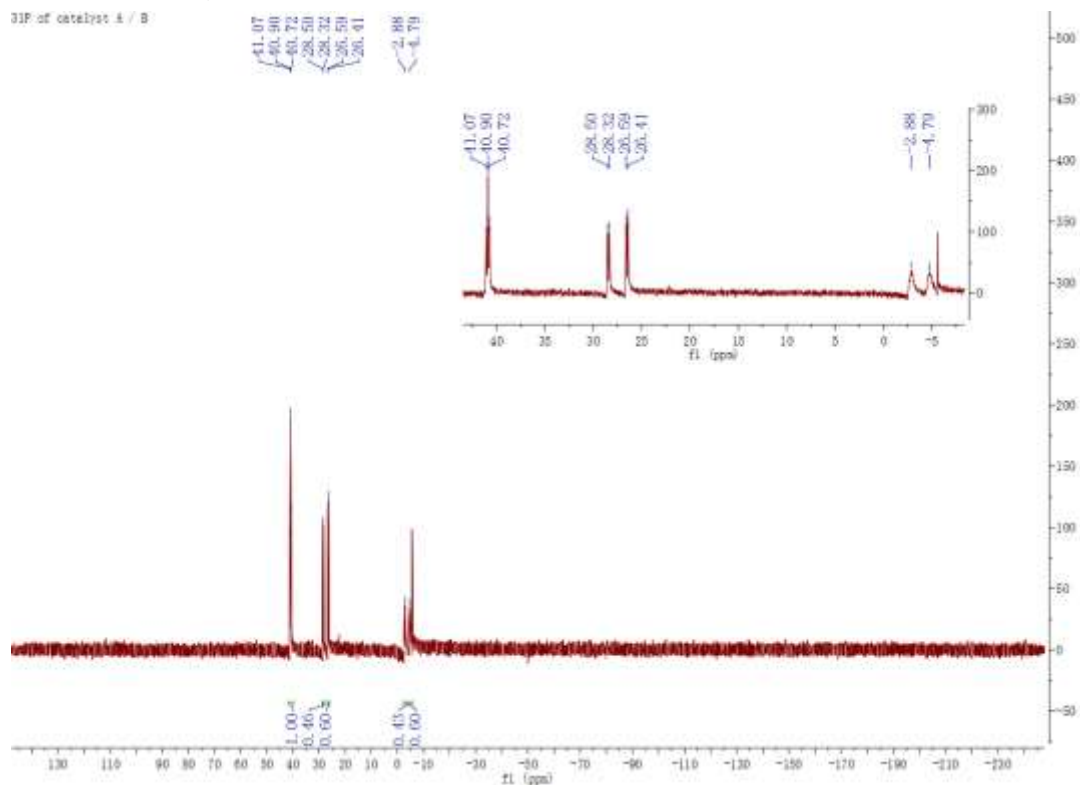

### Full Mass of catalyst C

TXF-C#12-13 RT: 0.11-0.12 AV: 2 NL: 2.22E7  
T: FTMS (1,1) + p ESI Full ms [200.00-2000.00]

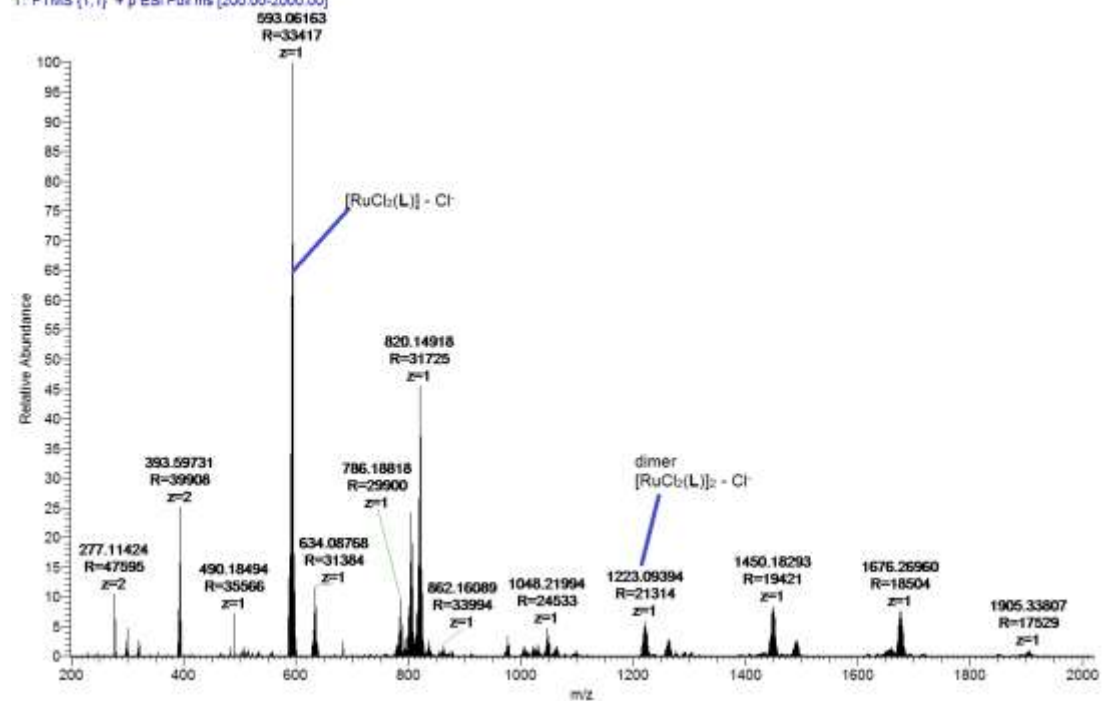



## Full Mass of catalyst E

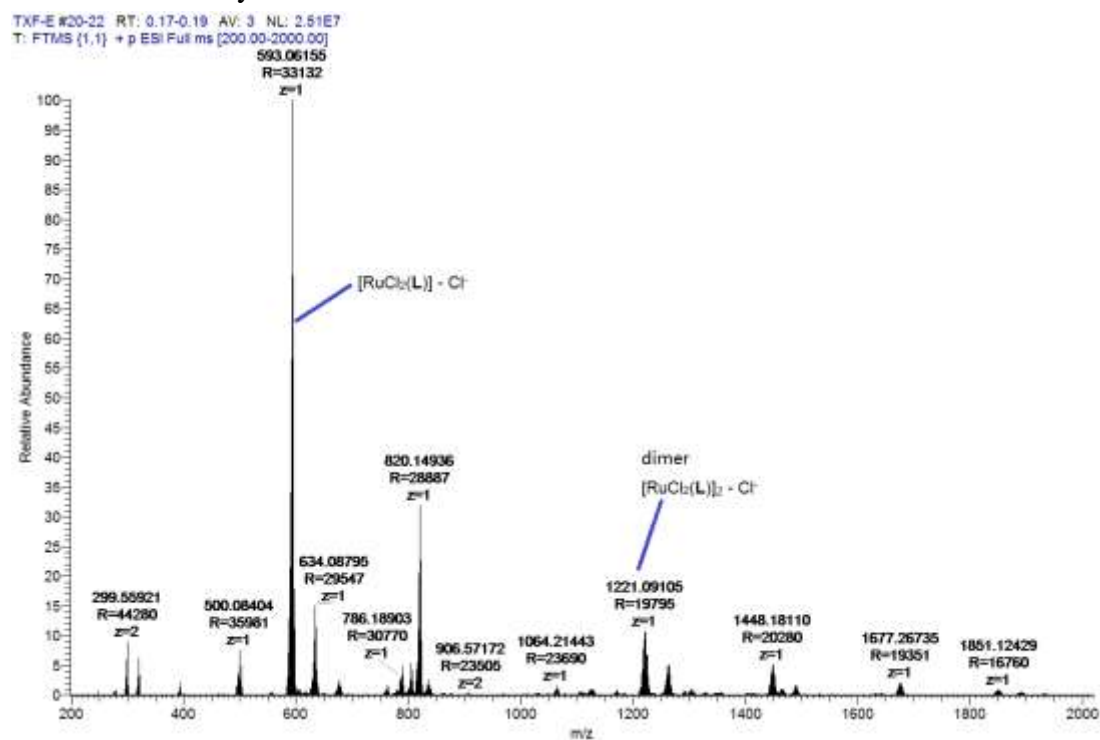

## 5. Reference

- (1) Pérez Luna, A.; Ceschi, M. A.; Bonin, M.; Micouin, L.; Husson, H. P.; Gougeon, S.; Estenne-Bouhtou, G.; Marabout, B.; Sevrin, M.; George, P. *The Journal of organic chemistry* **2002**, *67*, 3522.
- (2) Muehlebach, M.; Boeger, M.; Cederbaum, F.; Cornes, D.; Friedmann, A. A.; Glock, J.; Niderman, T.; Stoller, A.; Wagner, T. *Biorg. Med. Chem.* **2009**, *17*, 4241.
- (3) Nielsen, A. T.; Lawrence, G. W. *The Journal of organic chemistry* **1977**, *42*, 2900.
